# Supplementary material for: Eribulin, Child-Pugh score, and liver-function tests: lessons from pivotal breast cancer studies 301 and 305
Source: PubMed Central journal article supplement (PMC7977154; doi:10.1186/s13058-021-01407-w), 2021-03-18
Supplement: 13058_2021_1407_MOESM1_ESM.pdf [file 13058_2021_1407_MOESM1_ESM.pdf]

**SUPPLEMENTARY TABLES**

**Supplementary Table S1. Eribulin mesylate dose modifications and exposure in patients with or without liver lesion involvement (safety population)**

| Parameter                                  | With Liver Involvement |                    |                    |                    | Without Liver Involvement |                    |                    |                    |
|--------------------------------------------|------------------------|--------------------|--------------------|--------------------|---------------------------|--------------------|--------------------|--------------------|
|                                            | Normal                 | Liver Impairment   |                    |                    | Normal                    | Liver Impairment   |                    |                    |
|                                            | A<br>(n=204)           | B<br>(n=210)       | C<br>(n=294)       | D<br>(n=23)        | A<br>(n=336)              | B<br>(n=82)        | C<br>(n=146)       | D<br>(n=11)        |
| <b>Duration of treatment</b>               |                        |                    |                    |                    |                           |                    |                    |                    |
| n                                          | 204                    | 210                | 294                | 23                 | 336                       | 82                 | 146                | 11                 |
| Days, mean<br>(SD)                         | 154.74<br>(125.42)     | 143.29<br>(102.81) | 137.23<br>(99.45)  | 119.70<br>(62.81)  | 173.03<br>(182.53)        | 173.09<br>(161.23) | 146.36<br>(137.20) | 147.73<br>(98.73)  |
| <b>Number of cycles completed in study</b> |                        |                    |                    |                    |                           |                    |                    |                    |
| Median<br>(range)                          | 6.0<br>(1.0, 41.0)     | 6.0<br>(1.0, 27.0) | 5.0<br>(1.0, 27.0) | 5.0<br>(1.0, 11.0) | 6.0<br>(1.0, 65.0)        | 6.5<br>(1.0, 38.0) | 5.0<br>(1.0, 38.0) | 4.0<br>(2.0, 15.0) |
| <b>Actual dose intensity</b>               |                        |                    |                    |                    |                           |                    |                    |                    |
| n                                          | 204                    | 210                | 294                | 22                 | 336                       | 82                 | 146                | 11                 |
| Mean, mg/m <sup>2</sup> /week              | 0.83                   | 0.78               | 0.78               | 0.64               | 0.81                      | 0.77               | 0.77               | 0.67               |

|                                   |           |            |            |           |            |           |           |          |
|-----------------------------------|-----------|------------|------------|-----------|------------|-----------|-----------|----------|
| <b>(SD)</b>                       | (0.134)   | (0.155)    | (0.158)    | (0.165)   | (0.139)    | (0.164)   | (0.162)   | (0.217)  |
| <b>Patients who received dose</b> |           |            |            |           |            |           |           |          |
| <b>n (%)</b>                      | 204 (100) | 210 (100)  | 294 (100)  | 23 (100)  | 336 (100)  | 82 (100)  | 146 (100) | 11 (100) |
| <b>Dose reduction</b>             |           |            |            |           |            |           |           |          |
| <b>n (%)</b>                      | 48 (23.5) | 74 (35.2)  | 106 (36.1) | 15 (65.2) | 93 (27.7)  | 27 (32.9) | 47 (32.2) | 6 (54.6) |
| <b>Dose delay</b>                 |           |            |            |           |            |           |           |          |
| <b>n (%)</b>                      | 83 (40.7) | 105 (50.0) | 147 (50.0) | 17 (73.9) | 140 (41.7) | 36 (43.9) | 65 (44.5) | 6 (54.6) |

Group A, no liver impairment; group B, increased AST and/or ALT only; group C, any abnormality except increased bilirubin level; group D, increased bilirubin level.

ALT, alanine aminotransferase; AST, aspartate aminotransferase; SD, standard deviation.

**Supplementary Table S2. TEAEs occurring in >10% of patients in any group (safety population)**

| TEAE, n (%)               | Normal          |            | Liver Impairment |            |                 |            |                |           |
|---------------------------|-----------------|------------|------------------|------------|-----------------|------------|----------------|-----------|
|                           | Group A (n=540) |            | Group B (n=292)  |            | Group C (n=440) |            | Group D (n=34) |           |
|                           | All             | Grade ≥3   | All              | Grade ≥3   | All             | Grade ≥3   | All            | Grade ≥3  |
| <b>Any TEAE</b>           | 520 (96.3)      | 328 (60.7) | 278 (95.2)       | 209 (71.6) | 424 (96.4)      | 326 (74.1) | 34 (100)       | 29 (85.3) |
| <b>Neutropenia</b>        | 260 (48.2)      | 216 (40.0) | 168 (57.5)       | 147 (50.3) | 253 (57.5)      | 222 (50.5) | 25 (73.5)      | 24 (70.6) |
| <b>Alopecia</b>           | 204 (37.8)      | 0          | 131 (44.9)       | 0          | 183 (41.6)      | 0          | 16 (47.1)      | 0         |
| <b>Nausea</b>             | 140 (25.9)      | 2 (0.4)    | 96 (32.9)        | 1 (0.3)    | 143 (32.5)      | 5 (1.1)    | 9 (26.5)       | 0         |
| <b>Leukopenia</b>         | 145 (26.9)      | 70 (13.0)  | 72 (24.7)        | 42 (14.4)  | 121 (27.5)      | 66 (15.0)  | 11 (32.4)      | 8 (23.5)  |
| <b>Asthenia</b>           | 96 (17.8)       | 20 (3.7)   | 56 (19.2)        | 16 (5.5)   | 101 (23.0)      | 30 (6.8)   | 10 (29.4)      | 3 (8.8)   |
| <b>Decreased appetite</b> | 89 (16.5)       | 0          | 48 (16.4)        | 3 (1.0)    | 82 (18.6)       | 5 (1.1)    | 9 (26.5)       | 0         |
| <b>Diarrhea</b>           | 84 (15.6)       | 5 (0.9)    | 49 (16.8)        | 1 (0.3)    | 75 (17.1)       | 1 (0.2)    | 9 (26.5)       | 0         |
| <b>Fatigue</b>            | 122 (22.6)      | 10 (1.9)   | 75 (25.7)        | 11 (3.8)   | 106 (24.1)      | 18 (4.1)   | 8 (23.5)       | 0         |
| <b>Pyrexia</b>            | 84 (15.6)       | 1 (0.2)    | 52 (17.8)        | 0          | 81 (18.4)       | 2 (0.5)    | 9 (26.5)       | 0         |
| <b>Anemia</b>             | 90 (16.7)       | 3 (0.6)    | 53 (18.2)        | 11 (3.8)   | 96 (21.8)       | 16 (3.6)   | 7 (20.6)       | 2 (5.9)   |
| <b>Constipation</b>       | 68 (12.6)       | 1 (0.2)    | 62 (21.2)        | 1 (0.3)    | 90 (20.5)       | 4 (0.9)    | 5 (14.7)       | 0         |
| <b>Vomiting</b>           | 69 (12.8)       | 2 (0.4)    | 51 (17.5)        | 1 (0.3)    | 80 (18.2)       | 5 (1.1)    | 7 (20.6)       | 0         |
| <b>Headache</b>           | 80 (14.8)       | 4 (0.7)    | 56 (19.2)        | 2 (0.7)    | 79 (18.0)       | 2 (0.5)    | 4 (11.8)       | 0         |

|                                      |           |          |           |          |           |          |          |         |
|--------------------------------------|-----------|----------|-----------|----------|-----------|----------|----------|---------|
| <b>Dyspnea</b>                       | 65 (12.0) | 17 (3.2) | 37 (12.7) | 10 (3.4) | 63 (14.3) | 19 (4.3) | 6 (17.7) | 1 (2.9) |
| <b>Hypokalemia</b>                   | 21 (3.9)  | 5 (0.9)  | 12 (4.1)  | 4 (1.4)  | 28 (6.4)  | 9 (2.1)  | 6 (17.7) | 3 (8.8) |
| <b>Weight, decreased</b>             | 41 (7.6)  | 2 (0.4)  | 45 (15.4) | 0        | 77 (17.5) | 0        | 6 (17.7) | 1 (2.9) |
| <b>Peripheral sensory neuropathy</b> | 84 (15.6) | 16 (3.0) | 35 (12.0) | 9 (3.1)  | 46 (10.5) | 12 (2.7) | 5 (14.7) | 1 (2.9) |
| <b>Hyperbilirubinemia</b>            | 3 (0.6)   | 0        | 5 (1.7)   | 1 (0.3)  | 9 (2.1)   | 2 (0.5)  | 5 (14.7) | 2 (5.9) |
| <b>Lacrimation, increased</b>        | 17 (3.2)  | 0        | 26 (8.9)  | 1 (0.3)  | 30 (6.8)  | 1 (0.2)  | 5 (14.7) | 0       |
| <b>Stomatitis</b>                    | 25 (4.6)  | 1 (0.2)  | 18 (6.2)  | 1 (0.3)  | 34 (7.7)  | 4 (0.9)  | 5 (14.7) | 1 (2.9) |
| <b>Back pain</b>                     | 75 (13.9) | 7 (1.3)  | 39 (13.4) | 4 (1.4)  | 51 (11.6) | 6 (1.4)  | 4 (11.8) | 0       |
| <b>Bone pain</b>                     | 47 (8.7)  | 3 (0.6)  | 39 (13.4) | 10 (3.4) | 55 (12.5) | 15 (3.4) | 2 (5.9)  | 0       |
| <b>Arthralgia</b>                    | 66 (12.2) | 5 (0.9)  | 33 (11.3) | 1 (0.3)  | 42 (9.6)  | 1 (0.2)  | 2 (5.9)  | 0       |
| <b>Cough</b>                         | 60 (11.1) | 2 (0.4)  | 35 (12.0) | 1 (0.3)  | 51 (11.6) | 2 (0.5)  | 4 (11.8) | 0       |
| <b>Paresthesia</b>                   | 37 (6.9)  | 10 (1.9) | 27 (9.3)  | 2 (0.7)  | 38 (8.6)  | 3 (0.7)  | 4 (11.8) | 0       |
| <b>Dry mouth</b>                     | 21 (3.9)  | 0        | 12 (4.1)  | 0        | 19 (4.3)  | 0        | 4 (11.8) | 0       |
| <b>Epistaxis</b>                     | 6 (1.1)   | 0        | 4 (1.4)   | 0        | 10 (2.3)  | 0        | 4 (11.8) | 0       |
| <b>ALT, increased</b>                | 29 (5.4)  | 12 (2.2) | 33 (11.3) | 14 (4.8) | 41 (9.3)  | 15 (3.4) | 1 (2.9)  | 0       |
| <b>Pain in extremity</b>             | 56 (10.4) | 2 (0.4)  | 32 (11.0) | 1 (0.3)  | 45 (10.2) | 5 (1.1)  | 0        | 0       |

---

Group A, no liver impairment; group B, increased AST and/or ALT only; group C, any abnormality except increased bilirubin; group D, increased bilirubin.

ALT, alanine aminotransferase; AST, aspartate aminotransferase; TEAE, treatment-emergent adverse event.

**Supplementary Table S3. TEAEs leading to dose modifications (reductions, delays, or interruptions) in patients with or without liver lesion involvement and by CTCAE grade (safety population)**

|                       | With Liver Involvement |            |                  |           | Without Liver Involvement |           |                  |          |
|-----------------------|------------------------|------------|------------------|-----------|---------------------------|-----------|------------------|----------|
|                       | Normal                 |            | Liver Impairment |           | Normal                    |           | Liver Impairment |          |
|                       | A                      | B          | C                | D         | A                         | B         | C                | D        |
|                       | (n=204)                | (n=210)    | (n=294)          | (n=23)    | (n=336)                   | (n=82)    | (n=146)          | (n=11)   |
| <b>Overall, n (%)</b> |                        |            |                  |           |                           |           |                  |          |
| <b>Total</b>          | 85 (41.7)              | 114 (54.3) | 154 (52.4)       | 21 (91.3) | 146 (43.5)                | 45 (54.9) | 77 (52.7)        | 5 (45.5) |
| <b>Grade 1</b>        | 3 (1.5)                | 7 (3.3)    | 8 (2.7)          | 2 (8.7)   | 5 (1.5)                   | 4 (4.9)   | 5 (3.4)          | 0        |
| <b>Grade 2</b>        | 21 (10.3)              | 15 (7.1)   | 18 (6.1)         | 0         | 26 (7.7)                  | 10 (12.2) | 16 (11.0)        | 0        |
| <b>Grade 3</b>        | 38 (18.6)              | 53 (25.2)  | 73 (24.8)        | 6 (26.1)  | 73 (21.7)                 | 23 (28.1) | 41 (28.1)        | 4 (36.4) |
| <b>Grade 4</b>        | 23 (11.3)              | 39 (18.6)  | 55 (18.7)        | 13 (56.5) | 42 (12.5)                 | 8 (9.8)   | 15 (10.3)        | 1 (9.1)  |

Group A, no liver impairment; group B, increased AST and/or ALT only; group C, any abnormality except increased bilirubin; group D, increased bilirubin.

ALT, alanine aminotransferase; AST, aspartate aminotransferase; CTCAE, Common Terminology Criteria for Adverse Events; TEAE, treatment-emergent adverse event.

**Supplementary Table S4. Neutrophil/granulocyte CTCAE grade at baseline and after cycle 1 in patients with liver impairment**

| n (%)                | Normal     | Liver Impairment |            |           |
|----------------------|------------|------------------|------------|-----------|
|                      | Group A    | Group B          | Group C    | Group D   |
|                      | (n=540)    | (n=292)          | (n=440)    | (n=34)    |
| <b>Baseline</b>      |            |                  |            |           |
| <b>n</b>             | 538        | 286              | 433        | 34        |
| <b>Any grade</b>     | 26 (4.8)   | 14 (4.9)         | 17 (3.9)   | 2 (5.9)   |
| <b>Grade 1</b>       | 25 (4.6)   | 13 (4.5)         | 16 (3.7)   | 1 (2.9)   |
| <b>Grade 2</b>       | 1 (0.2)    | 1 (0.3)          | 1 (0.2)    | 1 (2.9)   |
| <b>Cycle 1 day 8</b> |            |                  |            |           |
| <b>n</b>             | 532        | 275              | 414        | 33        |
| <b>Any grade</b>     | 154 (28.9) | 106 (38.5)       | 155 (37.4) | 10 (30.3) |
| <b>Grade 1</b>       | 68 (12.8)  | 35 (12.7)        | 49 (11.8)  | 2 (6.1)   |
| <b>Grade 2</b>       | 64 (12.0)  | 43 (15.6)        | 65 (15.7)  | 4 (12.1)  |
| <b>Grade 3</b>       | 16 (3.0)   | 17 (6.2)         | 27 (6.5)   | 1 (3.0)   |
| <b>Grade 4</b>       | 6 (1.1)    | 11 (4.0)         | 14 (3.4)   | 3 (9.1)   |
| <b>Cycle 2 day 8</b> |            |                  |            |           |
| <b>n</b>             | 507        | 266              | 393        | 28        |
| <b>Any grade</b>     | 77 (15.2)  | 59 (22.2)        | 83 (21.1)  | 4 (14.3)  |
| <b>Grade 1</b>       | 42 (8.3)   | 31 (11.7)        | 40 (10.2)  | 2 (7.1)   |
| <b>Grade 2</b>       | 29 (5.7)   | 22 (8.3)         | 33 (8.4)   | 2 (7.1)   |
| <b>Grade 3</b>       | 6 (1.2)    | 3 (1.1)          | 6 (1.5)    | 0         |
| <b>Grade 4</b>       | 0          | 3 (1.1)          | 4 (1.0)    | 0         |

---

**Cycle 3 day 8**

---

| <b>n</b>         | <b>427</b> | <b>222</b> | <b>320</b> | <b>26</b> |
|------------------|------------|------------|------------|-----------|
| <b>Any grade</b> | 66 (15.5)  | 42 (18.9)  | 56 (17.5)  | 4 (15.4)  |
| <b>Grade 1</b>   | 38 (8.9)   | 21 (9.5)   | 27 (8.4)   | 3 (11.5)  |
| <b>Grade 2</b>   | 20 (4.7)   | 16 (7.2)   | 21 (6.6)   | 1 (3.8)   |
| <b>Grade 3</b>   | 7 (1.6)    | 4 (1.8)    | 6 (1.9)    | 0         |
| <b>Grade 4</b>   | 1 (0.2)    | 1 (0.5)    | 2 (0.6)    | 0         |

---

Percentages based on the number of subjects with nonmissing data at each visit within each laboratory test.

Group A, no liver impairment; group B, increased AST and/or ALT only; group C, any abnormality except increased bilirubin; group D, increased bilirubin.

ALT, alanine aminotransferase; AST, aspartate aminotransferase; CTCAE, Common Terminology Criteria for Adverse Events.



**Supplementary Table S5. Overall survival in patients with liver impairment (ITT population)**

|                                     | <b>Normal</b>       | <b>Liver Impairment Subgroup</b> |                     |                     |
|-------------------------------------|---------------------|----------------------------------|---------------------|---------------------|
|                                     | <b>Group A</b>      | <b>Group B</b>                   | <b>Group C</b>      | <b>Group D</b>      |
|                                     | <b>(n=546)</b>      | <b>(n=294)</b>                   | <b>(n=443)</b>      | <b>(n=34)</b>       |
| <b>Median OS, months</b>            | 17.5                | 13.2                             | 12.3                | 12.3                |
| <b>(95% CI)</b>                     | (15.9–18.8)         | (11.7–14.5)                      | (11.1–13.6)         | (8.0–16.1)          |
| <b>OS rate (95% CI)<sup>a</sup></b> |                     |                                  |                     |                     |
| <b>1 year</b>                       | 0.672 (0.633–0.712) | 0.542 (0.485–0.599)              | 0.505 (0.458–0.552) | 0.529 (0.362–0.739) |
| <b>2 years</b>                      | 0.370 (0.328–0.412) | 0.199 (0.151–0.248)              | 0.183 (0.145–0.221) | 0.206 (0.070–0.342) |
| <b>3 years</b>                      | 0.212 (0.170–0.253) | 0.098 (0.055–0.141)              | 0.085 (0.051–0.118) | 0 (NE–NE)           |

<sup>a</sup>OS rate at 1, 2, and 3 years and the 95% CIs were calculated using Kaplan–Meier estimate and Greenwood’s formula.

Group A, no liver impairment; group B, increased AST and/or ALT only; group C, any abnormality except increased bilirubin; group D, increased bilirubin.

ALT, alanine aminotransferase; AST, aspartate aminotransferase; CI, confidence interval; ITT, intent to treat; NE, nonestimable; OS, overall survival.

**Supplementary Table S6. Overall survival in patients with or without liver involvement (ITT population)**

|                                     | With Liver Involvement |                        |                        |                        | Without Liver Involvement |                        |                        |                        |
|-------------------------------------|------------------------|------------------------|------------------------|------------------------|---------------------------|------------------------|------------------------|------------------------|
|                                     | Normal                 | Liver Impairment       |                        |                        | Normal                    | Liver Impairment       |                        |                        |
|                                     | Group A<br>(n=207)     | Group B<br>(n=211)     | Group C<br>(n=296)     | Group D<br>(n=23)      | Group A<br>(n=339)        | Group B<br>(n=83)      | Group C<br>(n=147)     | Group D<br>(n=11)      |
| <b>Overall, n (%)</b>               |                        |                        |                        |                        |                           |                        |                        |                        |
| <b>Median OS, months (95% CI)</b>   | 16.0<br>(14.6–18.0)    | 11.9<br>(10.0–13.2)    | 11.6<br>(10.0–13.1)    | 9.5<br>(6.9–16.3)      | 18.6<br>(16.5–22.2)       | 18.1<br>(14.9–21.2)    | 14.5<br>(11.2–16.7)    | 12.6<br>(6.3–16.3)     |
| <b>OS rate (95% CI)<sup>a</sup></b> |                        |                        |                        |                        |                           |                        |                        |                        |
| <b>1 year</b>                       | 0.640<br>(0.574–0.706) | 0.487<br>(0.419–0.554) | 0.475<br>(0.418–0.532) | 0.435<br>(0.232–0.637) | 0.692<br>(0.643–0.742)    | 0.683<br>(0.582–0.784) | 0.565<br>(0.484–0.686) | 0.727<br>(0.464–0.990) |
| <b>2 years</b>                      | 0.305<br>(0.238–0.371) | 0.144<br>(0.094–0.195) | 0.149<br>(0.105–0.192) | 0.217<br>(0.049–0.386) | 0.408<br>(0.354–0.461)    | 0.340<br>(0.233–0.448) | 0.251<br>(0.178–0.324) | 0.182<br>(0.000–0.410) |
| <b>3 years</b>                      | 0.146<br>(0.084–0.208) | 0.081<br>(0.039–0.123) | 0.081<br>(0.044–0.119) | 0<br>(NE–NE)           | 0.248<br>(0.193–0.303)    | 0.137<br>(0.029–0.244) | 0.097<br>(0.034–0.161) | 0<br>(NE–NE)           |

<sup>a</sup>OS rates at 1, 2, and 3 years and the 95% CIs were calculated using Kaplan–Meier estimate and Greenwood’s formula.

Group A, no liver impairment; group B, increased AST and/or ALT only; group C, any abnormality except increased bilirubin; group D, increased bilirubin.

---

ALT, alanine aminotransferase; AST, aspartate aminotransferase; CI, confidence interval; ITT, intent to treat; NE, nonestimable; OS, overall survival.
