# Supplementary material for: Eribulin, Child-Pugh score, and liver-function tests: lessons from pivotal breast cancer studies 301 and 305
Source: PubMed Central journal article supplement (PMC7977154; doi:10.1186/s13058-021-01407-w), 2021-03-18
Supplement: 13058_2021_1407_MOESM2_ESM.pdf [file 13058_2021_1407_MOESM2_ESM.pdf]

**Supplementary Table S2. TEAEs occurring in >10% of patients in any group (safety population)**

| TEAE, n (%)               | Normal          |            | Liver Impairment |            |                 |            |                |           |
|---------------------------|-----------------|------------|------------------|------------|-----------------|------------|----------------|-----------|
|                           | Group A (n=540) |            | Group B (n=292)  |            | Group C (n=440) |            | Group D (n=34) |           |
|                           | All             | Grade ≥3   | All              | Grade ≥3   | All             | Grade ≥3   | All            | Grade ≥3  |
| <b>Any TEAE</b>           | 520 (96.3)      | 328 (60.7) | 278 (95.2)       | 209 (71.6) | 424 (96.4)      | 326 (74.1) | 34 (100)       | 29 (85.3) |
| <b>Neutropenia</b>        | 260 (48.2)      | 216 (40.0) | 168 (57.5)       | 147 (50.3) | 253 (57.5)      | 222 (50.5) | 25 (73.5)      | 24 (70.6) |
| <b>Alopecia</b>           | 204 (37.8)      | 0          | 131 (44.9)       | 0          | 183 (41.6)      | 0          | 16 (47.1)      | 0         |
| <b>Nausea</b>             | 140 (25.9)      | 2 (0.4)    | 96 (32.9)        | 1 (0.3)    | 143 (32.5)      | 5 (1.1)    | 9 (26.5)       | 0         |
| <b>Leukopenia</b>         | 145 (26.9)      | 70 (13.0)  | 72 (24.7)        | 42 (14.4)  | 121 (27.5)      | 66 (15.0)  | 11 (32.4)      | 8 (23.5)  |
| <b>Asthenia</b>           | 96 (17.8)       | 20 (3.7)   | 56 (19.2)        | 16 (5.5)   | 101 (23.0)      | 30 (6.8)   | 10 (29.4)      | 3 (8.8)   |
| <b>Decreased appetite</b> | 89 (16.5)       | 0          | 48 (16.4)        | 3 (1.0)    | 82 (18.6)       | 5 (1.1)    | 9 (26.5)       | 0         |
| <b>Diarrhea</b>           | 84 (15.6)       | 5 (0.9)    | 49 (16.8)        | 1 (0.3)    | 75 (17.1)       | 1 (0.2)    | 9 (26.5)       | 0         |
| <b>Fatigue</b>            | 122 (22.6)      | 10 (1.9)   | 75 (25.7)        | 11 (3.8)   | 106 (24.1)      | 18 (4.1)   | 8 (23.5)       | 0         |
| <b>Pyrexia</b>            | 84 (15.6)       | 1 (0.2)    | 52 (17.8)        | 0          | 81 (18.4)       | 2 (0.5)    | 9 (26.5)       | 0         |
| <b>Anemia</b>             | 90 (16.7)       | 3 (0.6)    | 53 (18.2)        | 11 (3.8)   | 96 (21.8)       | 16 (3.6)   | 7 (20.6)       | 2 (5.9)   |
| <b>Constipation</b>       | 68 (12.6)       | 1 (0.2)    | 62 (21.2)        | 1 (0.3)    | 90 (20.5)       | 4 (0.9)    | 5 (14.7)       | 0         |
| <b>Vomiting</b>           | 69 (12.8)       | 2 (0.4)    | 51 (17.5)        | 1 (0.3)    | 80 (18.2)       | 5 (1.1)    | 7 (20.6)       | 0         |

|                                      |           |          |           |          |           |          |          |         |
|--------------------------------------|-----------|----------|-----------|----------|-----------|----------|----------|---------|
| <b>Headache</b>                      | 80 (14.8) | 4 (0.7)  | 56 (19.2) | 2 (0.7)  | 79 (18.0) | 2 (0.5)  | 4 (11.8) | 0       |
| <b>Dyspnea</b>                       | 65 (12.0) | 17 (3.2) | 37 (12.7) | 10 (3.4) | 63 (14.3) | 19 (4.3) | 6 (17.7) | 1 (2.9) |
| <b>Hypokalemia</b>                   | 21 (3.9)  | 5 (0.9)  | 12 (4.1)  | 4 (1.4)  | 28 (6.4)  | 9 (2.1)  | 6 (17.7) | 3 (8.8) |
| <b>Weight, decreased</b>             | 41 (7.6)  | 2 (0.4)  | 45 (15.4) | 0        | 77 (17.5) | 0        | 6 (17.7) | 1 (2.9) |
| <b>Peripheral sensory neuropathy</b> | 84 (15.6) | 16 (3.0) | 35 (12.0) | 9 (3.1)  | 46 (10.5) | 12 (2.7) | 5 (14.7) | 1 (2.9) |
| <b>Hyperbilirubinemia</b>            | 3 (0.6)   | 0        | 5 (1.7)   | 1 (0.3)  | 9 (2.1)   | 2 (0.5)  | 5 (14.7) | 2 (5.9) |
| <b>Lacrimation, increased</b>        | 17 (3.2)  | 0        | 26 (8.9)  | 1 (0.3)  | 30 (6.8)  | 1 (0.2)  | 5 (14.7) | 0       |
| <b>Stomatitis</b>                    | 25 (4.6)  | 1 (0.2)  | 18 (6.2)  | 1 (0.3)  | 34 (7.7)  | 4 (0.9)  | 5 (14.7) | 1 (2.9) |
| <b>Back pain</b>                     | 75 (13.9) | 7 (1.3)  | 39 (13.4) | 4 (1.4)  | 51 (11.6) | 6 (1.4)  | 4 (11.8) | 0       |
| <b>Bone pain</b>                     | 47 (8.7)  | 3 (0.6)  | 39 (13.4) | 10 (3.4) | 55 (12.5) | 15 (3.4) | 2 (5.9)  | 0       |
| <b>Arthralgia</b>                    | 66 (12.2) | 5 (0.9)  | 33 (11.3) | 1 (0.3)  | 42 (9.6)  | 1 (0.2)  | 2 (5.9)  | 0       |
| <b>Cough</b>                         | 60 (11.1) | 2 (0.4)  | 35 (12.0) | 1 (0.3)  | 51 (11.6) | 2 (0.5)  | 4 (11.8) | 0       |
| <b>Paraesthesia</b>                  | 37 (6.9)  | 10 (1.9) | 27 (9.3)  | 2 (0.7)  | 38 (8.6)  | 3 (0.7)  | 4 (11.8) | 0       |
| <b>Dry mouth</b>                     | 21 (3.9)  | 0        | 12 (4.1)  | 0        | 19 (4.3)  | 0        | 4 (11.8) | 0       |
| <b>Epistaxis</b>                     | 6 (1.1)   | 0        | 4 (1.4)   | 0        | 10 (2.3)  | 0        | 4 (11.8) | 0       |
| <b>ALT, increased</b>                | 29 (5.4)  | 12 (2.2) | 33 (11.3) | 14 (4.8) | 41 (9.3)  | 15 (3.4) | 1 (2.9)  | 0       |
| <b>Pain in extremity</b>             | 56 (10.4) | 2 (0.4)  | 32 (11.0) | 1 (0.3)  | 45 (10.2) | 5 (1.1)  | 0        | 0       |

---

Group A, no liver impairment; group B, increased AST and/or ALT only; group C, any abnormality except increased bilirubin; group D, increased bilirubin.

ALT, alanine aminotransferase; AST, aspartate aminotransferase; TEAE, treatment-emergent adverse event.
