# Supplementary material for: Eribulin, Child-Pugh score, and liver-function tests: lessons from pivotal breast cancer studies 301 and 305
Source: PubMed Central journal article supplement (PMC7977154; doi:10.1186/s13058-021-01407-w), 2021-03-18
Supplement: 13058_2021_1407_MOESM3_ESM.pdf [file 13058_2021_1407_MOESM3_ESM.pdf]

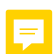

**Supplementary Table S3. TEAEs leading to dose modifications (reductions, delays, or interruptions) in patients with or without liver lesion involvement and by CTCAE grade (safety population)**

|                       | With Liver Involvement |               |                  |             | Without Liver Involvement |             |                  |             |
|-----------------------|------------------------|---------------|------------------|-------------|---------------------------|-------------|------------------|-------------|
|                       | Normal                 |               | Liver Impairment |             | Normal                    |             | Liver Impairment |             |
|                       | A<br>(n=204)           | B<br>(n=210)  | C<br>(n=294)     | D<br>(n=23) | A<br>(n=336)              | B<br>(n=82) | C<br>(n=146)     | D<br>(n=11) |
| <b>Overall, n (%)</b> |                        |               |                  |             |                           |             |                  |             |
| <b>Total</b>          | 85<br>(41.7)           | 114<br>(54.3) | 154<br>(52.4)    | 21 (91.3)   | 146<br>(43.5)             | 45 (54.9)   | 77 (52.7)        | 5 (45.5)    |
| <b>Grade 1</b>        | 3 (1.5)                | 7 (3.3)       | 8 (2.7)          | 2 (8.7)     | 5 (1.5)                   | 4 (4.9)     | 5 (3.4)          | 0           |
| <b>Grade 2</b>        | 21<br>(10.3)           | 15 (7.1)      | 18 (6.1)         | 0           | 26 (7.7)                  | 10 (12.2)   | 16 (11.0)        | 0           |
| <b>Grade 3</b>        | 38<br>(18.6)           | 53 (25.2)     | 73<br>(24.8)     | 6 (26.1)    | 73 (21.7)                 | 23 (28.1)   | 41 (28.1)        | 4 (36.4)    |
| <b>Grade 4</b>        | 23<br>(11.3)           | 39 (18.6)     | 55<br>(18.7)     | 13 (56.5)   | 42 (12.5)                 | 8 (9.8)     | 15 (10.3)        | 1 (9.1)     |

Group A, no liver impairment; group B, increased AST and/or ALT only; group C, any abnormality except increased bilirubin; group D, increased bilirubin.

CTCAE, Common Terminology Criteria for Adverse Events; TEAE, treatment-emergent adverse event.
