# Supplementary material for: Eribulin, Child-Pugh score, and liver-function tests: lessons from pivotal breast cancer studies 301 and 305
Source: PubMed Central journal article supplement (PMC7977154; doi:10.1186/s13058-021-01407-w), 2021-03-18
Supplement: 13058_2021_1407_MOESM4_ESM.pdf [file 13058_2021_1407_MOESM4_ESM.pdf]

**Supplementary Table S4. Neutrophil/granulocyte CTCAE grade at baseline and after cycle 1 in patients with liver impairment**

| n (%)                | Normal             |                    | Liver Impairment   |                   |
|----------------------|--------------------|--------------------|--------------------|-------------------|
|                      | Group A<br>(n=540) | Group B<br>(n=292) | Group C<br>(n=440) | Group D<br>(n=34) |
| <b>Baseline</b>      |                    |                    |                    |                   |
| n                    | 538                | 286                | 433                | 34                |
| <b>Any grade</b>     | 26 (4.8)           | 14 (4.9)           | 17 (3.9)           | 2 (5.9)           |
| <b>Grade 1</b>       | 25 (4.6)           | 13 (4.5)           | 16 (3.7)           | 1 (2.9)           |
| <b>Grade 2</b>       | 1 (0.2)            | 1 (0.3)            | 1 (0.2)            | 1 (2.9)           |
| <b>Cycle 1 day 8</b> |                    |                    |                    |                   |
| n                    | 532                | 275                | 414                | 33                |
| <b>Any grade</b>     | 154 (28.9)         | 106 (38.5)         | 155 (37.4)         | 10 (30.3)         |
| <b>Grade 1</b>       | 68 (12.8)          | 35 (12.7)          | 49 (11.8)          | 2 (6.1)           |
| <b>Grade 2</b>       | 64 (12.0)          | 43 (15.6)          | 65 (15.7)          | 4 (12.1)          |
| <b>Grade 3</b>       | 16 (3.0)           | 17 (6.2)           | 27 (6.5)           | 1 (3.0)           |
| <b>Grade 4</b>       | 6 (1.1)            | 11 (4.0)           | 14 (3.4)           | 3 (9.1)           |
| <b>Cycle 2 day 8</b> |                    |                    |                    |                   |
| n                    | 507                | 266                | 393                | 28                |
| <b>Any grade</b>     | 77 (15.2)          | 59 (22.2)          | 83 (21.1)          | 4 (14.3)          |
| <b>Grade 1</b>       | 42 (8.3)           | 31 (11.7)          | 40 (10.2)          | 2 (7.1)           |
| <b>Grade 2</b>       | 29 (5.7)           | 22 (8.3)           | 33 (8.4)           | 2 (7.1)           |
| <b>Grade 3</b>       | 6 (1.2)            | 3 (1.1)            | 6 (1.5)            | 0                 |
| <b>Grade 4</b>       | 0                  | 3 (1.1)            | 4 (1.0)            | 0                 |
| <b>Cycle 3 day 8</b> |                    |                    |                    |                   |
| n                    | 427                | 222                | 320                | 26                |
| <b>Any grade</b>     | 66 (15.5)          | 42 (18.9)          | 56 (17.5)          | 4 (15.4)          |
| <b>Grade 1</b>       | 38 (8.9)           | 21 (9.5)           | 27 (8.4)           | 3 (11.5)          |
| <b>Grade 2</b>       | 20 (4.7)           | 16 (7.2)           | 21 (6.6)           | 1 (3.8)           |
| <b>Grade 3</b>       | 7 (1.6)            | 4 (1.8)            | 6 (1.9)            | 0                 |
| <b>Grade 4</b>       | 1 (0.2)            | 1 (0.5)            | 2 (0.6)            | 0                 |

Percentages based on the number of subjects with nonmissing data at each visit within each

laboratory test.

Group A, no liver impairment; group B, increased AST and/or ALT only; group C, any abnormality except increased bilirubin; group D, increased bilirubin.

ALT, alanine aminotransferase; AST, aspartate aminotransferase; CTCAE, Common Terminology Criteria for Adverse Events.
