# Supplementary material for: Eribulin, Child-Pugh score, and liver-function tests: lessons from pivotal breast cancer studies 301 and 305
Source: PubMed Central journal article supplement (PMC7977154; doi:10.1186/s13058-021-01407-w), 2021-03-18
Supplement: 13058_2021_1407_MOESM5_ESM.pdf [file 13058_2021_1407_MOESM5_ESM.pdf]

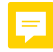

**Supplementary Table S5. Overall survival in patients with liver impairment (ITT population)**

|                                     | Normal              | Liver Impairment Subgroup |                     |                     |
|-------------------------------------|---------------------|---------------------------|---------------------|---------------------|
|                                     | Group A<br>(n=546)  | Group B<br>(n=294)        | Group C<br>(n=443)  | Group D<br>(n=34)   |
| <b>Median OS, months (95% CI)</b>   | 17.5<br>(15.9–18.8) | 13.2<br>(11.7–14.5)       | 12.3<br>(11.1–13.6) | 12.3<br>(8.0–16.1)  |
| <b>OS rate (95% CI)<sup>a</sup></b> |                     |                           |                     |                     |
| <b>1 year</b>                       | 0.672 (0.633–0.712) | 0.542 (0.485–0.599)       | 0.505 (0.458–0.552) | 0.529 (0.362–0.739) |
| <b>2 years</b>                      | 0.370 (0.328–0.412) | 0.199 (0.151–0.248)       | 0.183 (0.145–0.221) | 0.206 (0.070–0.342) |
| <b>3 years</b>                      | 0.212 (0.170–0.253) | 0.098 (0.055–0.141)       | 0.085 (0.051–0.118) | 0 (NE–NE)           |

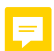

<sup>a</sup>OS rate at 1, 2, and 3 years and the 95% CIs were calculated using Kaplan–Meier estimate and Greenwood’s formula.

Group A, no liver impairment; group B, increased AST and/or ALT only; group C, any abnormality except increased bilirubin; group D, increased bilirubin.

ALT, alanine aminotransferase; AST, aspartate aminotransferase; CI, confidence interval; ITT, intent to treat; NE, nonestimable; OS, overall survival.
