# Supplementary material for: Eribulin, Child-Pugh score, and liver-function tests: lessons from pivotal breast cancer studies 301 and 305
Source: PubMed Central journal article supplement (PMC7977154; doi:10.1186/s13058-021-01407-w), 2021-03-18
Supplement: 13058_2021_1407_MOESM6_ESM.pdf [file 13058_2021_1407_MOESM6_ESM.pdf]

**Supplementary Table S6. Overall survival in patients with or without liver involvement (ITT population)**

|                                     | With Liver Involvement |                        |                        |                        | Without Liver Involvement |                        |                        |                        |
|-------------------------------------|------------------------|------------------------|------------------------|------------------------|---------------------------|------------------------|------------------------|------------------------|
|                                     | Normal                 | Liver Impairment       |                        |                        | Normal                    | Liver Impairment       |                        |                        |
|                                     | Group A<br>(n=207)     | Group B<br>(n=211)     | Group C<br>(n=296)     | Group D<br>(n=23)      | Group A<br>(n=339)        | Group B<br>(n=83)      | Group C<br>(n=147)     | Group D<br>(n=11)      |
| <b>Overall, n (%)</b>               |                        |                        |                        |                        |                           |                        |                        |                        |
| <b>Median OS, months (95% CI)</b>   | 16.0<br>(14.6–18.0)    | 11.9<br>(10.0–13.2)    | 11.6<br>(10.0–13.1)    | 9.5<br>(6.9–16.3)      | 18.6<br>(16.5–22.2)       | 18.1<br>(14.9–21.2)    | 14.5<br>(11.2–16.7)    | 12.6<br>(6.3–16.3)     |
| <b>OS rate (95% CI)<sup>a</sup></b> |                        |                        |                        |                        |                           |                        |                        |                        |
| <b>1 year</b>                       | 0.640<br>(0.574–0.706) | 0.487<br>(0.419–0.554) | 0.475<br>(0.418–0.532) | 0.435<br>(0.232–0.637) | 0.692<br>(0.643–0.742)    | 0.683<br>(0.582–0.784) | 0.565<br>(0.484–0.686) | 0.727<br>(0.464–0.990) |
| <b>2 years</b>                      | 0.305<br>(0.238–0.371) | 0.144<br>(0.094–0.195) | 0.149<br>(0.105–0.192) | 0.217<br>(0.049–0.386) | 0.408<br>(0.354–0.461)    | 0.340<br>(0.233–0.448) | 0.251<br>(0.178–0.324) | 0.182<br>(0.000–0.410) |
| <b>3 years</b>                      | 0.146<br>(0.084–0.208) | 0.081<br>(0.039–0.123) | 0.081<br>(0.044–0.119) | 0<br>(NE–NE)           | 0.248<br>(0.193–0.303)    | 0.137<br>(0.029–0.244) | 0.097<br>(0.034–0.161) | 0<br>(NE–NE)           |

<sup>a</sup>OS rates at 1, 2, and 3 years and the 95% CIs were calculated using Kaplan–Meier estimate and Greenwood’s formula.

Group A, no liver impairment; group B, increased AST and/or ALT only; group C, any abnormality except increased bilirubin; group D, increased bilirubin.

ALT, alanine aminotransferase; AST, aspartate aminotransferase; CI, confidence interval; ITT, intent to treat; NE, nonestimable; OS, overall survival.
